# Supplementary material
Source: Springer Nature journal article supplement (https://www.springermedizin.de/resource/supplementary/12936_2008_633_MOESM6_ESM.pdf/9547870)

- Breeding habitat
- ▲ Mud House
- Ground level in SFS
- Thatch roofed insectary

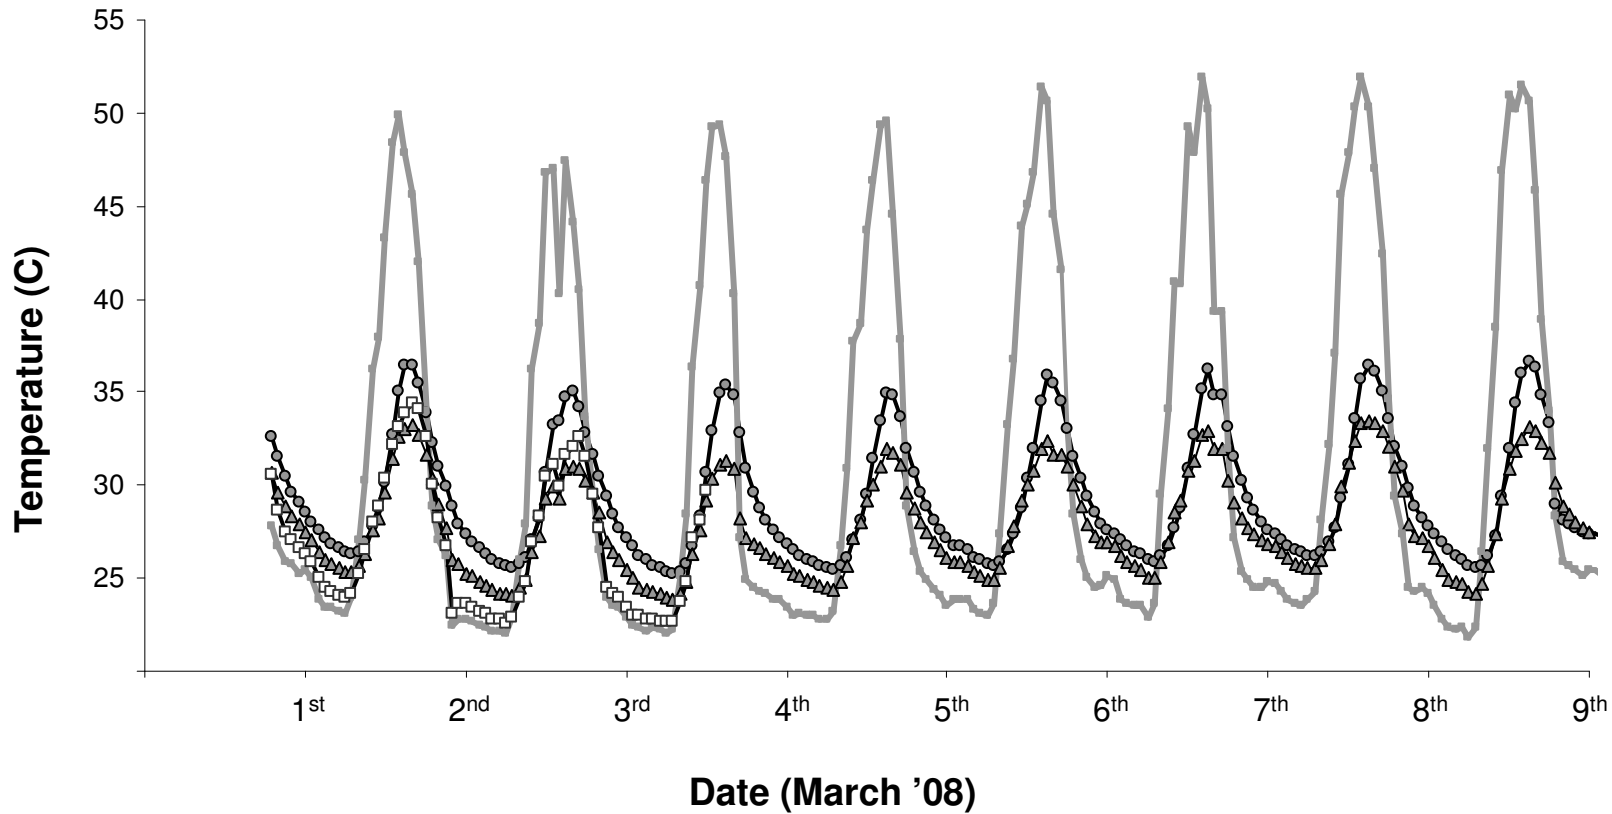

Supplement: MOESM6 [file 9547870]
